# Supplementary material for: Effect of point-of-care susceptibility testing in general practice on appropriate prescription of antibiotics for patients with uncomplicated urinary tract infection: a diagnostic randomised controlled trial
Source: PubMed Central journal article supplement — BMJ Open. 2017 Oct 16;7(10):e018028. doi: 10.1136/bmjopen-2017-018028 (PMC5652479; doi:10.1136/bmjopen-2017-018028), 2017-10-16
Supplement: bmjopen-2017-018028supp001.pdf [file bmjopen-2017-018028supp001.pdf]

Appendix 1: Data on 341 patients, where the results of both index and reference as well as treatment were available. The red boxes contain cases where the GP was not compliant with the test result. The red numbers are cases where the treatment was inappropriate for any of the reasons stated in Table 3 in the main manuscript.

|                                                 |                                   |                                                |                                   |                                                |                                   |                                                |                                   |
|-------------------------------------------------|-----------------------------------|------------------------------------------------|-----------------------------------|------------------------------------------------|-----------------------------------|------------------------------------------------|-----------------------------------|
| Enrolled+reference<br>341 patients              |                                   |                                                |                                   |                                                |                                   |                                                |                                   |
| Culture and susceptibility testing<br>179       |                                   |                                                |                                   | Culture-only<br>162                            |                                   |                                                |                                   |
| Index test positive<br>127                      |                                   | Index test negative<br>52                      |                                   | Index test positive<br>119                     |                                   | Index test negative<br>143                     |                                   |
| Reference test positive<br>96                   | Reference test negative<br>31     | Reference test positive<br>15                  | Reference test negative<br>37     | Reference test positive<br>95                  | Reference test negative<br>24     | Reference test positive<br>9                   | Reference test negative<br>34     |
| True positives treated:<br>App: 84<br>Inapp: 12 | False positives treated:<br>31    | False negatives treated:<br>App: 1<br>Inapp: 1 | True negatives treated:<br>2      | True positives treated:<br>App: 88<br>Inapp: 6 | False positives treated:<br>22    | False negatives treated:<br>App: 2<br>Inapp: 1 | True negatives treated:<br>5      |
| True positives not treated:<br>0                | False positives not treated:<br>0 | False negatives not treated:<br>13             | True negatives not treated:<br>35 | True positives not treated:<br>1               | False positives not treated:<br>2 | False negatives not treated:<br>6              | True negatives not treated:<br>29 |

Green boxes: GPs compliant with test result

Red boxes: GPs not compliant with test results

Green numbers: Appropriate treatments

Red numbers: Inappropriate treatments
